# Supplementary material for: Evaluation of the Effectiveness of the Policy of Holding the Second Dose of Vaccination: Lessons from the Outbreak in Ho Chi Minh City
Source: MDPI journal article supplement (doi:10.3390/vaccines11020293), 2023-01-29
Supplement: s1 [file s1]

**Evaluation of the effectiveness of the policy of delaying the second dose of vaccination: Lessons from the outbreak in Ho Chi Minh city**

**Supplementary Table S1.** STROBE Statement — Checklist of items that should be included in reports of *cross-sectional studies*.

|                              | Item No | Recommendation                                                                                                                                                                       | Page No |
|------------------------------|---------|--------------------------------------------------------------------------------------------------------------------------------------------------------------------------------------|---------|
| Title and abstract           | 1       | (a) Indicate the study’s design with a commonly used term in the title or the abstract                                                                                               | 1, 2    |
|                              |         | (b) Provide in the abstract an informative and balanced summary of what was done and what was found                                                                                  | 1, 2    |
| Introduction                 |         |                                                                                                                                                                                      |         |
| Background/rationale         | 2       | Explain the scientific background and rationale for the investigation being reported                                                                                                 | 2       |
| Objectives                   | 3       | State specific objectives, including any prespecified hypotheses                                                                                                                     | 2       |
| Methods                      |         |                                                                                                                                                                                      |         |
| Study design                 | 4       | Present key elements of study design early in the paper                                                                                                                              | 3       |
| Setting                      | 5       | Describe the setting, locations, and relevant dates, including periods of recruitment, exposure, follow-up, and data collection                                                      | 3       |
| Participants                 | 6       | (a) Give the eligibility criteria, and the sources and methods of selection of participants                                                                                          | 3       |
| Variables                    | 7       | Clearly define all outcomes, exposures, predictors, potential confounders, and effect modifiers. Give diagnostic criteria, if applicable                                             | 3       |
| Data sources/<br>measurement | 8*      | For each variable of interest, give sources of data and details of methods of assessment (measurement). Describe comparability of assessment methods if there is more than one group | 3       |
| Bias                         | 9       | Describe any efforts to address potential sources of bias                                                                                                                            | 3       |

|                        |     |                                                                                                                                                                                                              |     |
|------------------------|-----|--------------------------------------------------------------------------------------------------------------------------------------------------------------------------------------------------------------|-----|
| Study size             | 10  | Explain how the study size was arrived at                                                                                                                                                                    | NA  |
| Quantitative variables | 11  | Explain how quantitative variables were handled in the analyses. If applicable, describe which groupings were chosen and why                                                                                 | 3   |
| Statistical methods    | 12  | (a) Describe all statistical methods, including those used to control for confounding                                                                                                                        | 3   |
|                        |     | (b) Describe any methods used to examine subgroups and interactions                                                                                                                                          | NA  |
|                        |     | (c) Explain how missing data were addressed                                                                                                                                                                  | NA  |
|                        |     | (d) If applicable, describe analytical methods taking account of sampling strategy                                                                                                                           | NA  |
|                        |     | (e) Describe any sensitivity analyses                                                                                                                                                                        | NA  |
| Results                |     |                                                                                                                                                                                                              |     |
| Participants           | 13* | (a) Report numbers of individuals at each stage of study—eg numbers potentially eligible, examined for eligibility, confirmed eligible, included in the study, completing follow-up, and analysed            | 4   |
|                        |     | (b) Give reasons for non-participation at each stage                                                                                                                                                         | NA  |
|                        |     | (c) Consider use of a flow diagram                                                                                                                                                                           | NA  |
| Descriptive data       | 14* | (a) Give characteristics of study participants (eg demographic, clinical, social) and information on exposures and potential confounders                                                                     | 4   |
|                        |     | (b) Indicate number of participants with missing data for each variable of interest                                                                                                                          | NA  |
| Outcome data           | 15* | Report numbers of outcome events or summary measures                                                                                                                                                         | 4-8 |
| Main results           | 16  | (a) Give unadjusted estimates and, if applicable, confounder-adjusted estimates and their precision (eg, 95% confidence interval). Make clear which confounders were adjusted for and why they were included | 8   |

|                          |    |                                                                                                                                                                            |    |
|--------------------------|----|----------------------------------------------------------------------------------------------------------------------------------------------------------------------------|----|
|                          |    | (b) Report category boundaries when continuous variables were categorized                                                                                                  | 8  |
|                          |    | (c) If relevant, consider translating estimates of relative risk into absolute risk for a meaningful time period                                                           | NA |
| Other analyses           | 17 | Report other analyses done—eg analyses of subgroups and interactions, and sensitivity analyses                                                                             | NA |
| <b>Discussion</b>        |    |                                                                                                                                                                            |    |
| Key results              | 18 | Summarise key results with reference to study objectives                                                                                                                   | 8  |
| Limitations              | 19 | Discuss limitations of the study, taking into account sources of potential bias or imprecision.<br>Discuss both direction and magnitude of any potential bias              | 9  |
| Interpretation           | 20 | Give a cautious overall interpretation of results considering objectives, limitations, multiplicity of analyses, results from similar studies, and other relevant evidence | 9  |
| Generalisability         | 21 | Discuss the generalisability (external validity) of the study results                                                                                                      | 9  |
| <b>Other information</b> |    |                                                                                                                                                                            |    |
| Funding                  | 22 | Give the source of funding and the role of the funders for the present study and, if applicable, for the original study on which the present article is based              | 10 |

**Supplementary Table S2.** Univariable and multivariable logistic regression model to predict low SPO2, sub-grouped by gender.

|                                                                      | Univariable |             |         | Gender    |             |         |           |             |         | Multivariable |             |         |
|----------------------------------------------------------------------|-------------|-------------|---------|-----------|-------------|---------|-----------|-------------|---------|---------------|-------------|---------|
|                                                                      |             |             |         | Female    |             |         | Male      |             |         |               |             |         |
| Predictors                                                           | Estimates   | 95% CI      | P-value | Estimates | 95% CI      | P-value | Estimates | 95% CI      | P-value | Estimates     | 95% CI      | P-value |
| (Intercept)                                                          | –           | –           | –       | 0.94      | 0.88 – 1.00 | 0.054   | 0.98      | 0.88 – 1.09 | 0.713   | 0.96          | 0.91 – 1.02 | 0.237   |
| Age (each 10 years)                                                  | 1.03        | 1.02 – 1.04 | <0.001* | 1.02      | 1.01 – 1.03 | <0.001  | 1.03      | 1.01 – 1.05 | 0.001   | 1.02          | 1.01 – 1.03 | <0.001* |
| Number of people living with COVID-19 patients in the same household | 1.01        | 1.00 – 1.02 | 0.02*   | 1.01      | 0.99 – 1.02 | 0.331   | 1.01      | 1.00 – 1.03 | 0.09    | 1.01          | 1.00 – 1.02 | 0.025*  |
| Lung diseases <sup>#</sup>                                           |             |             |         |           |             |         |           |             |         |               |             |         |
| No                                                                   | Reference   |             |         | Reference |             |         | Reference |             |         | Reference     |             |         |
| Yes                                                                  | 1.54        | 1.38 – 1.73 | <0.001* | 1.42      | 1.23 – 1.64 | <0.001  | 1.17      | 0.98 – 1.39 | 0.075   | 1.35          | 1.21 – 1.51 | <0.001* |
| Gender                                                               |             |             |         |           |             |         |           |             |         |               |             |         |
| Male                                                                 | Reference   |             |         |           |             |         |           |             |         | Reference     |             |         |
| Female                                                               | 0.97        | 0.94 – 1.00 | 0.028*  |           |             |         |           |             |         | 0.95          | 0.93 – 0.98 | 0.002*  |
| Shortness of breath                                                  |             |             |         |           |             |         |           |             |         |               |             |         |
| No                                                                   | Reference   |             |         | Reference |             |         | Reference |             |         | Reference     |             |         |
| Yes                                                                  | 1.37        | 1.28 – 1.46 | <0.001* | 1.33      | 1.23 – 1.42 | <0.001  | 1.21      | 1.09 – 1.35 | 0.001   | 1.30          | 1.22 – 1.38 | <0.001* |
| Sneeze                                                               |             |             |         |           |             |         |           |             |         |               |             |         |
| No                                                                   | Reference   |             |         | Reference |             |         | Reference |             |         | Reference     |             |         |
| Yes                                                                  | 1.16        | 1.11 – 1.20 | <0.001* | 1.06      | 1.02 – 1.11 | 0.005   | 1.18      | 1.10 – 1.26 | <0.001  | 1.10          | 1.06 – 1.15 | <0.001* |
| Fainting                                                             |             |             |         |           |             |         |           |             |         |               |             |         |
| No                                                                   | Reference   |             |         | Reference |             |         | Reference |             |         | Reference     |             |         |
| Yes                                                                  | 1.12        | 1.05 – 1.20 | 0.001*  | 1.18      | 1.09 – 1.28 | <0.001  | 0.98      | 0.89 – 1.09 | 0.774   | 1.08          | 1.02 – 1.15 | 0.014*  |
| Cough                                                                |             |             |         |           |             |         |           |             |         |               |             |         |
| No                                                                   | Reference   |             |         | Reference |             |         | Reference |             |         | Reference     |             |         |

|                              |           |             |         |           |             |       |           |             |        |           |             |         |
|------------------------------|-----------|-------------|---------|-----------|-------------|-------|-----------|-------------|--------|-----------|-------------|---------|
| Yes                          | 1.12      | 1.09 – 1.15 | <0.001* | 1.03      | 0.99 – 1.06 | 0.166 | 1.12      | 1.05 – 1.18 | <0.001 | 1.05      | 1.02 – 1.08 | 0.001*  |
| <b>Vaccination</b>           |           |             |         |           |             |       |           |             |        |           |             |         |
| First dose less than 21 days | Reference |             |         | Reference |             |       | Reference |             |        | Reference |             |         |
| Holding the second dose*     | 0.94      | 0.91 – 0.97 | 0.001*  | 0.97      | 0.93 – 1.01 | 0.100 | 0.87      | 0.81 – 0.93 | <0.001 | 0.94      | 0.91 – 0.97 | <0.001* |
| Full vaccination             | 0.91      | 0.85 – 0.97 | 0.003*  | 0.98      | 0.92 – 1.04 | 0.459 | 0.84      | 0.74 – 0.95 | 0.007  | 0.94      | 0.88 – 0.99 | 0.032*  |
| <b>Observations</b>          |           | 1142        |         | 692       |             |       | 450       |             |        | 1142      |             |         |
| <b>R<sup>2</sup></b>         | -         |             |         | 0.192     |             |       | 0.237     |             |        | 0.186     |             |         |
| <b>AUC</b>                   | -         |             |         | 87.4%     |             |       | 85.4%     |             |        | 86.4%     |             |         |
